# Supplementary material
Source: MDPI journal article supplement (https://www.mdpi.com/2073-4352/13/5/753)
Supplement: s1 [file s1]

# Effects of different CO<sub>2</sub> concentrations and degradation media on static corrosion of commercially pure zinc

Souhila Ould Mohamed<sup>1</sup>, Sofia Gambaro<sup>2</sup>, Ana Laura Ramírez-Ledesma<sup>3</sup>, Carlo Paternoster<sup>1</sup>, Diego Mantovani<sup>1,\*</sup>

<sup>1</sup> Lab Biomaterials and Bioengineering. CRC Tier I. Dept Min-Metl and Materials Engineering & CHU de Québec Research Center. Division of Regenerative Medicine. Laval University, Quebec City, Canada.

<sup>2</sup> National Research Council, Institute of Condensed Matter Chemistry and Technologies for Energy, CNR-ICMATE, Genoa, 16149, Italy.

<sup>3</sup> Departamento de Ingeniería Metalúrgica, Facultad de Química, Universidad Nacional Autónoma de México, Av. Universidad 3000, Circuito Exterior S/N, Cd. Universitaria, 04510 Ciudad de México, Mexico

Figure.S1: C1s HR details for samples under ambient condition.

| <b>Zn<sub>BASE</sub></b> | <b>Band</b> | <b>Position</b> |                 | <b>FWHM</b> | <b>%Gauss</b> | <b>%Area</b>    |                 |
|--------------------------|-------------|-----------------|-----------------|-------------|---------------|-----------------|-----------------|
|                          |             | <b><i>m</i></b> | <b><i>s</i></b> |             |               | <b><i>m</i></b> | <b><i>s</i></b> |
|                          | <b>1</b>    | 284.8           | 0.1             | 1.6         | 70            | 69.7            | 0.8             |
| <b>Zn<sub>HSS</sub></b>  | <b>2</b>    | 286.5           | 0.1             | 1.6         | 70            | 16.4            | 1.9             |
|                          | <b>3</b>    | 288.7           | 0.1             | 1.6         | 70            | 13.2            | 1.6             |
|                          | <b>4</b>    | 291.1           | 0.0             | 1.6         | 70            | 0.7             | 0.7             |
| <b>Zn<sub>HSS</sub></b>  | <b>Band</b> | <b>Position</b> |                 | <b>FWHM</b> | <b>%Gauss</b> | <b>%Area</b>    |                 |
|                          |             | <b><i>m</i></b> | <b><i>s</i></b> |             |               | <b><i>m</i></b> | <b><i>s</i></b> |
|                          | <b>1</b>    | 284.8           | 0.0             | 1.6         | 70            | 84.5            | 0.9             |
| <b>Zn<sub>PSS</sub></b>  | <b>2</b>    | 286.5           | 0.1             | 1.6         | 70            | 5.5             | 0.9             |
|                          | <b>3</b>    | 288.4           | 0.0             | 1.6         | 70            | 5.1             | 0.1             |
|                          | <b>4</b>    | 289.8           | 0.1             | 1.6         | 70            | 4.8             | 1.4             |
| <b>Zn<sub>PSS</sub></b>  | <b>Band</b> | <b>Position</b> |                 | <b>FWHM</b> | <b>%Gauss</b> | <b>%Area</b>    |                 |
|                          |             | <b><i>m</i></b> | <b><i>s</i></b> |             |               | <b><i>m</i></b> | <b><i>s</i></b> |
|                          | <b>1</b>    | 284.8           | 0.1             | 1.6         | 70            | 73.8            | 6.7             |
| <b>Zn<sub>NSS</sub></b>  | <b>2</b>    | 286.9           | 0.4             | 1.6         | 70            | 7.4             | 1.9             |
|                          | <b>3</b>    | 289.1           | 0.0             | 1.6         | 70            | 9.8             | 3.6             |
|                          | <b>4</b>    | 291.2           | 0.2             | 1.6         | 70            | 9.0             | 1.4             |
| <b>Zn<sub>NSS</sub></b>  | <b>Band</b> | <b>Position</b> |                 | <b>FWHM</b> | <b>%Gauss</b> | <b>%Area</b>    |                 |
|                          |             | <b><i>m</i></b> | <b><i>s</i></b> |             |               | <b><i>m</i></b> | <b><i>s</i></b> |
|                          | <b>1</b>    | 284.8           | 0.1             | 1.6         | 70            | 55.2            | 5.5             |
| <b>Zn<sub>NSS</sub></b>  | <b>2</b>    | 286.8           | 0.4             | 1.6         | 70            | 12.0            | 3.4             |
|                          | <b>3</b>    | 289.4           | 166.5           | 1.6         | 70            | 24.4            | 7.4             |
|                          | <b>4</b>    | 291.1           | 166.9           | 1.6         | 70            | 8.5             | 3.5             |

Figure.S2: C1s HR details for samples immersed in 5 vol. % CO<sub>2</sub>.

| <i>Zn<sub>BASE</sub></i> | <i>Band</i> | <i>Position</i> |          | <i>FWHM</i> | <i>%Gauss</i> | <i>%Area</i> |          |
|--------------------------|-------------|-----------------|----------|-------------|---------------|--------------|----------|
|                          |             | <i>m</i>        | <i>s</i> |             |               | <i>m</i>     | <i>s</i> |
|                          | 1           | 284.8           | 0.1      | 1.6         | 70            | 69.7         | 0.8      |
| <i>Zn<sub>HSS</sub></i>  | 2           | 286.5           | 0.1      | 1.6         | 70            | 16.4         | 1.9      |
|                          | 3           | 288.7           | 0.1      | 1.6         | 70            | 13.2         | 1.6      |
|                          | 4           | 291.1           | 0.0      | 1.6         | 70            | 0.7          | 0.7      |
|                          | <i>Band</i> | <i>Position</i> |          | <i>FWHM</i> | <i>%Gauss</i> | <i>%Area</i> |          |
|                          |             | <i>m</i>        | <i>s</i> |             |               | <i>m</i>     | <i>s</i> |
| <i>Zn<sub>PSS</sub></i>  | 1           | 284.8           | 0.0      | 1.6         | 70            | 90.6         | 6.1      |
|                          | 2           | 286.8           | 0.1      | 1.6         | 70            | 4.8          | 2.3      |
|                          | 3           | 289.3           | 0.2      | 1.6         | 70            | 3.1          | 3.0      |
|                          | 4           | 291.1           | 0.0      | 1.6         | 70            | 1.4          | 1.6      |
|                          | <i>Band</i> | <i>Position</i> |          | <i>FWHM</i> | <i>%Gauss</i> | <i>%Area</i> |          |
|                          |             | <i>m</i>        | <i>s</i> |             |               | <i>m</i>     | <i>s</i> |
| <i>Zn<sub>NSS</sub></i>  | 1           | 284.8           | 0.0      | 1.6         | 70            | 68.8         | 5.6      |
|                          | 2           | 286.5           | 0.0      | 1.6         | 70            | 17.1         | 3.4      |
|                          | 3           | 288.9           | 0.1      | 1.6         | 70            | 9.8          | 1.9      |
|                          | 4           | 291.1           | 0.0      | 1.6         | 70            | 4.3          | 0.6      |
|                          | <i>Band</i> | <i>Position</i> |          | <i>FWHM</i> | <i>%Gauss</i> | <i>%Area</i> |          |
|                          |             | <i>m</i>        | <i>s</i> |             |               | <i>m</i>     | <i>s</i> |
|                          | 1           | 284.6           | 0.0      | 1.6         | 70            | 44.5         | 5.0      |
| <i>Zn<sub>NSS</sub></i>  | 2           | 286.4           | 0.2      | 1.6         | 70            | 12.5         | 2.0      |
|                          | 3           | 289.0           | 0.8      | 1.6         | 70            | 27.0         | 14.8     |
|                          | 4           | 290.5           | 0.8      | 1.6         | 70            | 16.0         | 17.9     |

Figure S3: O1s HR details for samples immersed in ambient atmosphere.

|                          | <i>Band</i> | <i>Position</i> |          | <i>FWHM</i> | <i>%Gauss</i> | <i>%Area</i> |          |
|--------------------------|-------------|-----------------|----------|-------------|---------------|--------------|----------|
|                          |             | <i>m</i>        | <i>s</i> |             |               | <i>m</i>     | <i>s</i> |
| <i>Zn<sub>BASE</sub></i> | <b>1</b>    | 528.6           | 0.0      | 1.6         | 70            | 4.1          | 1.6      |
|                          | <b>2</b>    | 531.0           | 0.1      | 1.6         | 70            | 92.3         | 2.4      |
|                          | <b>3</b>    | 533.2           | 0.0      | 1.6         | 70            | 3.6          | 1.0      |
|                          |             |                 |          |             |               |              |          |
|                          | <i>Band</i> | <i>Position</i> |          | <i>FWHM</i> | <i>%Gauss</i> | <i>%Area</i> |          |
|                          |             | <i>m</i>        | <i>s</i> |             |               | <i>m</i>     | <i>s</i> |
| <i>Zn<sub>HSS</sub></i>  | <b>1</b>    | 530.2           | 0.0      | 1.6         | 70.0          | 11.0         | 7.1      |
|                          | <b>2</b>    | 531.1           | 0.0      | 1.6         | 70.0          | 83.8         | 6.1      |
|                          | <b>3</b>    | 532.6           | 0.0      | 1.6         | 70.0          | 5.2          | 1.9      |
|                          |             |                 |          |             |               |              |          |
|                          | <i>Band</i> | <i>Position</i> |          | <i>FWHM</i> | <i>%Gauss</i> | <i>%Area</i> |          |
|                          |             | <i>m</i>        | <i>s</i> |             |               | <i>m</i>     | <i>s</i> |
| <i>Zn<sub>PSS</sub></i>  | <b>1</b>    | 528.6           | 0.5      | 1.6         | 70.0          | 2.8          | 1.3      |
|                          | <b>2</b>    | 531.0           | 0.0      | 1.6         | 70.0          | 88.5         | 1.1      |
|                          | <b>3</b>    | 532.6           | 0.0      | 1.6         | 70.0          | 8.7          | 1.2      |
|                          |             |                 |          |             |               |              |          |
|                          | <i>Band</i> | <i>Position</i> |          | <i>FWHM</i> | <i>%Gauss</i> | <i>%Area</i> |          |
|                          |             | <i>m</i>        | <i>s</i> |             |               | <i>m</i>     | <i>s</i> |
| <i>Zn<sub>NSS</sub></i>  | <b>1</b>    | 527.5           | 1.6      | 1.6         | 70.0          | 5.6          | 6.2      |
|                          | <b>2</b>    | 530.0           | 1.4      | 1.6         | 70.0          | 36.0         | 47.1     |
|                          | <b>3</b>    | 531.8           | 1.3      | 1.6         | 70.0          | 58.3         | 47.3     |
|                          |             |                 |          |             |               |              |          |

Figure S4: O1s HR details for samples immersed in 5 vol. % CO<sub>2</sub>.

|                          | <i>Band</i> | <i>Position</i> |          | <i>FWHM</i> | <i>%Gauss</i> | <i>%Area</i> |          |
|--------------------------|-------------|-----------------|----------|-------------|---------------|--------------|----------|
|                          |             | <i>m</i>        | <i>s</i> |             |               | <i>m</i>     | <i>s</i> |
| <i>Zn<sub>BASE</sub></i> | <b>1</b>    | 528.6           | 0.0      | 1.6         | 70.0          | 4.1          | 1.6      |
|                          | <b>2</b>    | 531.0           | 0.1      | 1.6         | 70.0          | 92.3         | 2.4      |
|                          | <b>3</b>    | 533.2           | 0.0      | 1.6         | 70.0          | 3.6          | 1.0      |
|                          | <i>Band</i> | <i>Position</i> |          | <i>FWHM</i> | <i>%Gauss</i> | <i>%Area</i> |          |
|                          |             | <i>m</i>        | <i>s</i> |             |               | <i>m</i>     | <i>s</i> |
| <i>Zn<sub>HSS</sub></i>  | <b>1</b>    | 526.6           | 0.0      | 1.6         | 70.0          | 0.3          | 0.5      |
|                          | <b>2</b>    | 531.1           | 0.0      | 1.6         | 70.0          | 98.6         | 0.7      |
|                          | <b>3</b>    | 533.2           | 0.0      | 1.6         | 70.0          | 1.1          | 0.2      |
|                          | <i>Band</i> | <i>Position</i> |          | <i>FWHM</i> | <i>%Gauss</i> | <i>%Area</i> |          |
|                          |             | <i>m</i>        | <i>s</i> |             |               | <i>m</i>     | <i>s</i> |
| <i>Zn<sub>PSS</sub></i>  | <b>1</b>    | 527.2           | 1.1      | 1.6         | 70.0          | 3.0          | 2.1      |
|                          | <b>2</b>    | 531.1           | 0.0      | 1.6         | 70.0          | 93.1         | 5.7      |
|                          | <b>3</b>    | 533.2           | 0.0      | 1.6         | 70.0          | 3.8          | 4.0      |
|                          | <i>Band</i> | <i>Position</i> |          | <i>FWHM</i> | <i>%Gauss</i> | <i>%Area</i> |          |
|                          |             | <i>m</i>        | <i>s</i> |             |               | <i>m</i>     | <i>s</i> |
| <i>Zn<sub>NSS</sub></i>  | <b>1</b>    | 528.3           | 0.4      | 1.6         | 70.0          | 2.2          | 0.8      |
|                          | <b>2</b>    | 531.0           | 0.1      | 1.6         | 70.0          | 96.3         | 3.1      |
|                          | <b>3</b>    | 533.2           | 0.0      | 1.6         | 70.0          | 1.5          | 2.3      |
